# Supplementary material for: Is research working for you? validating a tool to examine the capacity of health organizations to use research
Source: Implement Sci. 2009 Jul 23;4:46. doi: 10.1186/1748-5908-4-46 (PMC2727486; doi:10.1186/1748-5908-4-46)
Supplement: Additional file 1 — Table 1: Comparison of Individual and Consensus Scores by Higher versus Lower End Organizational Research Users. Original data used to perform analysis. [file 1748-5908-4-46-S1.xls]

## Sheet: Version 2
Table 1: Comparison of Individual and Consensus Scores by Higher versus Lower End Organizational Research Users
		Individual responses			Kruskal Wallis Test	Consensus scores			Kruskal Wallis Test
		N	Mean	SD		N	Mean	SD
Q1. Our organization has either enough skilled staff with adequate time, incentives and resources, or arrangements with external experts, who search for, monitor and/or undertake research relevant to our major management and policy decisions	High	37	3.05	0.48		9	3.22	0.51
	Low	35	2.33	0.77		14	2.64	0.66
	Total	72	2.7	0.73	0.000	23	2.87	0.66	0.041
Q1.2A Journals, by subscription, Internet or library access, including major health services research journals	High	38	3.11	0.72		7	3.21	0.39
	Low	35	2.73	0.82		14	2.75	0.58
	Total	73	2.92	0.78	0.057	21	2.9	0.56	0.054
Q1.2B Non-journal reports (grey literature), by library or Internet access and direct mailing from research/disseminating organizations	High	37	2.68	0.86		7	2.57	0.53
	Low	35	2.43	0.88		13	2.62	0.65
	Total	72	2.56	0.87	0.247	20	2.6	0.6	0.964
Q1.2C Databases, by subscription or Internet access, including resources such as the Canadian Institute for Health Information, citation indexes or the Cochrane Collaboration	High	36	2.57	0.81		7	3.07	0.73
	Low	35	2.01	0.9		12	2.58	0.79
	Total	71	2.3	0.9	0.012	19	2.76	0.79	0.240
Q1.2D Websites, including major evidence-based medicine, policy and decision-making sites which collate and/or evaluate sources of research such as Best Evidence, Bandolier, or the Université Laval	High	38	2.72	0.69		7	2.79	0.7
	Low	35	2.3	0.68		13	2.69	0.85
	Total	73	2.52	0.71	0.016	20	2.73	0.79	0.899
Q1.2E Working with researchers, by formal and informal networking; plus by providing places where researchers (on staff and/or external) can discuss their work with our staff and management; plus by getting involved in research as a host, decision-making partner	High	36	2.86	0.82		7	3.14	0.69
	Low	35	1.94	0.93		11	2.23	0.82
	Total	71	2.41	0.99	0.000	18	2.58	0.88	0.032
Q1.2F Learning from peers, by formal and informal networks, to exchange ideas, experiences and best practices	High	38	3.24	0.53		7	3.29	0.49
	Low	35	3.26	0.65		11	3.18	0.6
	Total	73	3.25	0.58	0.747	18	3.22	0.55	0.743
Q2.1A Evaluate the quality of the methodology used	High	33	2.68	0.93		7	3.07	0.45
	Low	34	1.65	0.7		12	2.04	0.81
	Total	67	2.16	0.97	0.000	19	2.42	0.85	0.005
Q2.1B Evaluate the reliability of specific research by identifying related evidence and comparing methods and results	High	32	2.67	0.84		6	3.08	0.49
	Low	33	1.61	0.67		11	1.95	0.79
	Total	65	2.13	0.92	0.000	17	2.35	0.88	0.004
Q2.2A Identify the relevant similarities and differences between our context and the research context (including organizational, political, social, technological, and structural factors, and skills required)	High	34	2.84	0.75		6	2.83	0.41
	Low	33	1.92	0.71		9	2.22	0.79
	Total	67	2.39	0.86	0.000	15	2.47	0.72	0.004
Q2.2B Evaluate which of these differences are relevant, and whether the research intervention could still be successfully implemented in our context	High	34	2.94	0.74		5	2.8	0.45
	Low	33	1.83	0.71		7	2.29	0.95
	Total	67	2.4	0.91	0.000	12	2.5	0.8	0.189
Q3.1A Present research results concisely and in accessible language	High	36	3.17	0.74		9	3.11	0.6
	Low	34	2.25	0.91		11	2.68	0.68
	Total	70	2.72	0.94	0.000	20	2.88	0.67	0.169
Q3.1B Synthesize in one document all relevant research as well as information and analysis from other resources	High	35	3	0.93		8	2.81	0.84
	Low	33	2.15	0.87		11	2.68	0.51
	Total	68	2.59	0.99	0.000	19	2.74	0.65	0.897
Q3.1C Link the research results to key issues in facing our decision makers and provide recommended actions	High	38	2.91	0.8		8	3	0.71
	Low	32	2.3	0.94		10	2.8	0.42
	Total	70	2.66	0.93	0.004	18	2.89	0.56	0.638
Q3.2 Summarized and easy-to-use research evidence is routinely brought to the attention of relevant decision makers	High	36	2.86	0.87		7	3	0.82
	Low	32	2.64	1.02		12	2.92	0.76
	Total	68	2.76	0.94	0.932	19	2.95	0.76	0.791
Q4.1A Using research is a priority: our organization has committed sufficient people, time, training and budgets to access, appraise, adapt and apply research in making decisions	High	36	2.35	0.67		6	2.5	0.84
	Low	33	1.86	0.58		11	2.59	0.63
	Total	39	2.12	0.67	0.003	17	2.56	0.68	0.520
Q4.1B Our organization's job descriptions and performance incentives include enough focus on activities which encourage using research	High	35	1.96	0.68		5	2	0
	Low	33	1.71	0.76		10	2.45	0.72
	Total	68	1.84	0.73	0.127	15	2.3	0.62	0.166
Q4.1C Both management and front-line staff support and participate in frequent fora where staff and invitees present and discuss research evidence related to the organization's main goals	High	37	2.41	0.74		7	2.5	0.5
	Low	33	2	0.67		10	2.15	0.34
	Total	70	2.21	0.74	0.021	17	2.29	0.44	0.107
Q4.1D Management has clearly communicated corporate strategy and priority areas for improvement, so that people creating or monitoring research evidence know what is needed	High	38	2.68	0.89		6	3.08	0.8
	Low	32	2.33	0.85		7	2.79	2.79
	Total	70	2.52	0.88	0.172	13	2.92	2.92	0.705
Q4.1E Our organization has effective communication channels so that priorities, evidence and ideas are exchanged a cross divisions, as well as between management front lines	High	38	2.86	0.88		7	2.71	0.49
	Low	33	2.79	0.8		8	3.13	0.44
	Total	71	2.82	0.84	0.692	15	2.93	0.5	0.147
Q4.1F Our corporate culture is to value and reward flexibility, change, and continuous quality improvement, and we provide adequate resources at all levels to support change	High	38	2.72	0.81		7	3.21	0.7
	Low	34	2.82	0.94		9	3.11	0.65
	Total	72	2.77	0.87	0.690	16	3.16	0.65	0.696
Q4.2A When we make major decisions, we usually allow enough time to identify researchable questions and create/obtain, analyze and consider research results and other evidence	High	38	2.58	0.69		6	2.67	0.41
	Low	32	2.22	0.88		9	2.44	0.68
	Total	70	2.41	0.8	0.148	15	2.53	0.58	0.614
Q4.2B Our management team has enough expertise to evaluate the feasibility of each option, including potential impact across the organization as well as on its clients, partners and other stakeholders	High	36	3.17	0.79		7	3.14	0.63
	Low	33	2.83	0.89		8	3.06	0.68
	Total	69	3.01	0.85	0.142	15	3.1	0.63	0.902
Q4.2C When staff develop or identify high quality and relevant research, decision makers will usually give formal consideration to any resulting recommendations	High	34	3.18	0.66		6	3.42	0.66
	Low	32	2.88	0.92		10	3.15	0.47
	Total	66	3.03	0.8	0.215	16	3.25	0.55	0.428
Q4.2D Staff and appropriate stakeholders know when and how major decisions will be made, how and when they can contribute evidence and how that information will be used	High	37	2.69	0.76		6	2.5	0.45
	Low	32	2.55	0.77		9	2.5	0.5
	Total	69	2.62	0.76	0.476	15	2.5	0.46	1.000
Q4.2E The staff who have provided evidence and analysis usually participate in the discussion before a decision is made and, when possible, so do relevant non-staff researchers	High	38	2.92	0.88		6	2.75	0.76
	Low	33	2.62	0.98		8	2.69	0.88
	Total	71	2.78	0.94	0.215	14	2.71	0.8	0.892
Q4.2F When a decision is made, feedback to staff and appropriate stakeholders includes a rationale for the decision, and review of how the available evidence influenced the choices made	High	37	2.84	0.69		7	2.93	0.61
	Low	33	2.85	0.91		6	2.58	0.8
	Total	70	2.84	0.8	0.670	13	2.77	0.7	0.262
